# Supplementary material for: Molecular dynamics investigation on the interaction of human angiotensin-converting enzyme with tetrapeptide inhibitors
Source: Royal Society of Chemistry journal article supplement (doi:10.1039/d1cp00172h), 2021-01-01
Supplement: d1cp00172h1.pdf [file d1cp00172h1.pdf]

## Electronic Supporting Information

### Molecular dynamics investigation on the interaction of human angiotensin-converting enzyme with tetra-peptide inhibitors

Xiaoting Liu,<sup>a</sup> Zheren Wang,<sup>a</sup> Yawen Gao,<sup>a</sup> Chunlei Liu,<sup>a</sup> Ji Wang,<sup>a</sup> Li Fang,<sup>a</sup> Weihong Min,<sup>\*a</sup> and Ji-Long Zhang<sup>b</sup>

<sup>a</sup> College of Food Science and Engineering, National Engineering Laboratory of Wheat and Corn Deep Processing, Jilin Agricultural University, Changchun 130118, Jilin, People's Republic of China.

<sup>b</sup> International Joint Research Laboratory of Nano-Micro Architecture Chemistry, Institute of Theoretical Chemistry, Jilin University, Changchun 130023, Jilin, People's Republic of China.

\* E-mail: [minwh2000@jlau.edu.cn](mailto:minwh2000@jlau.edu.cn). Tel: +86-139-4491-9697. Fax: +86-431-8451-7235.

**Table S1** Mutation Energy of Single Mutation Based on Tetra-peptide YIHP (Tyr3-Ile4-His5-Pro6) (kcal/mol).

|     | Tyr3  | Ile4  | His5  | Pro6  |
|-----|-------|-------|-------|-------|
| Gly | 4.04  | 0.71  | 1.37  | 3.38  |
| Ala | 3.36  | -0.05 | 0.77  | 2.11  |
| Val | 2.15  | -0.05 | 1.99  | 2.49  |
| Leu | 1.77  | 0.24  | 2.18  | 0.18  |
| Ile | 3.20  | ----  | 1.21  | 1.20  |
| Ser | 3.68  | 0.06  | 1.14  | 2.45  |
| Thr | 2.93  | -0.51 | 1.14  | 2.41  |
| Cys | 3.16  | -0.04 | 0.53  | 2.07  |
| Met | 2.50  | 0.41  | 1.92  | 1.20  |
| Asp | 5.11  | 3.28  | 5.47  | 6.64  |
| Glu | 7.27  | 4.26  | 7.83  | 7.16  |
| Asn | 1.45  | -0.69 | 0.65  | 3.62  |
| Gln | 5.98  | -0.32 | 2.48  | 1.80  |
| Lys | 1.19  | -2.70 | -0.82 | -1.63 |
| Arg | -0.01 | -2.15 | 1.42  | 0.02  |
| His | 0.47  | 0.14  | ----  | 0.58  |
| Pro | -0.76 | 0.27  | 9.09  | ----  |
| Phe | -0.29 | -0.48 | -0.10 | 1.26  |
| Tyr | ----  | -0.58 | -0.17 | 1.43  |
| Trp | 1.43  | 5.05  | 2.98  | 2.72  |

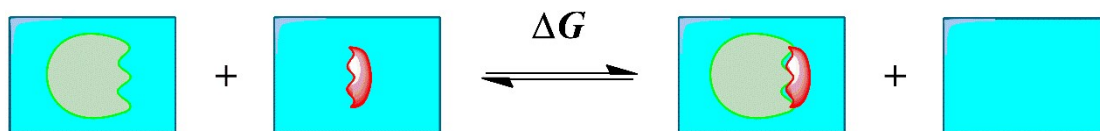

**Fig. S1** Schematic diagram of a ligand binding with a receptor in aqueous solution. On the left side, a ligand is so far away from its receptor that the interaction between them can be ignored. Correspondingly, on the right side, a ligand and a receptor form a complex, and the solution area occupied by the ligand returns to an isotropic and homogeneous state.

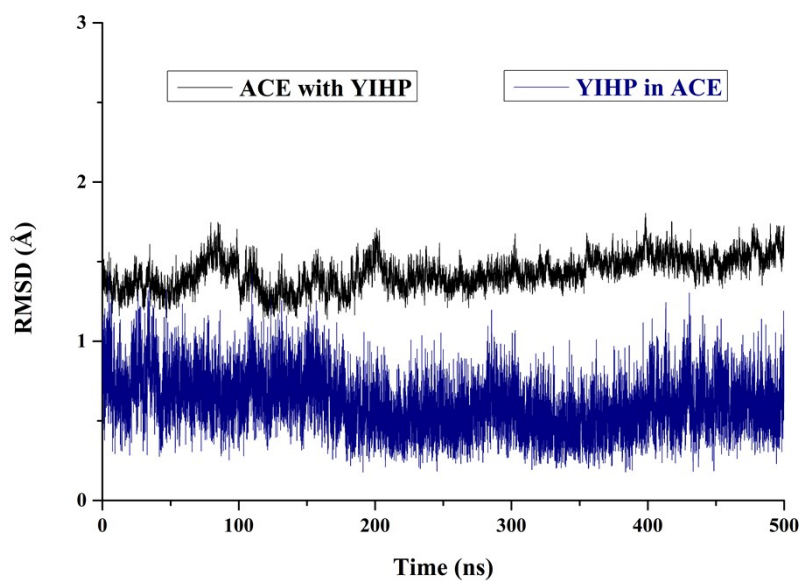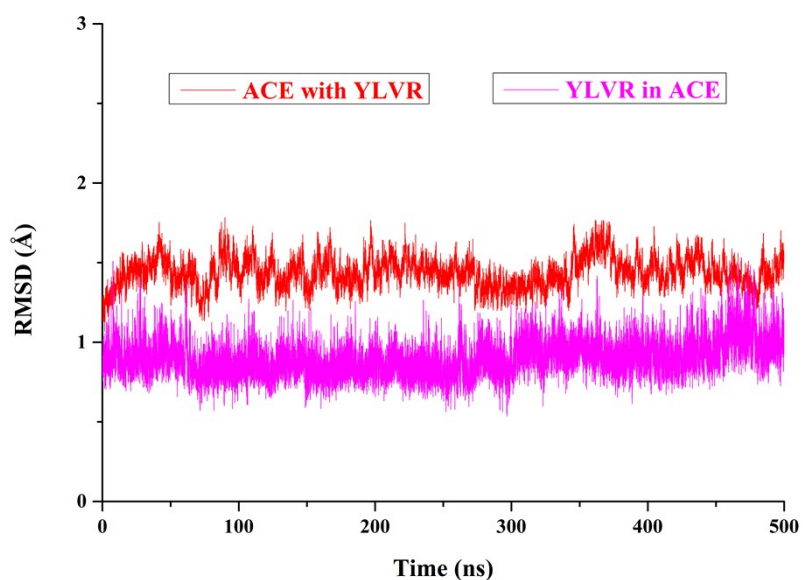

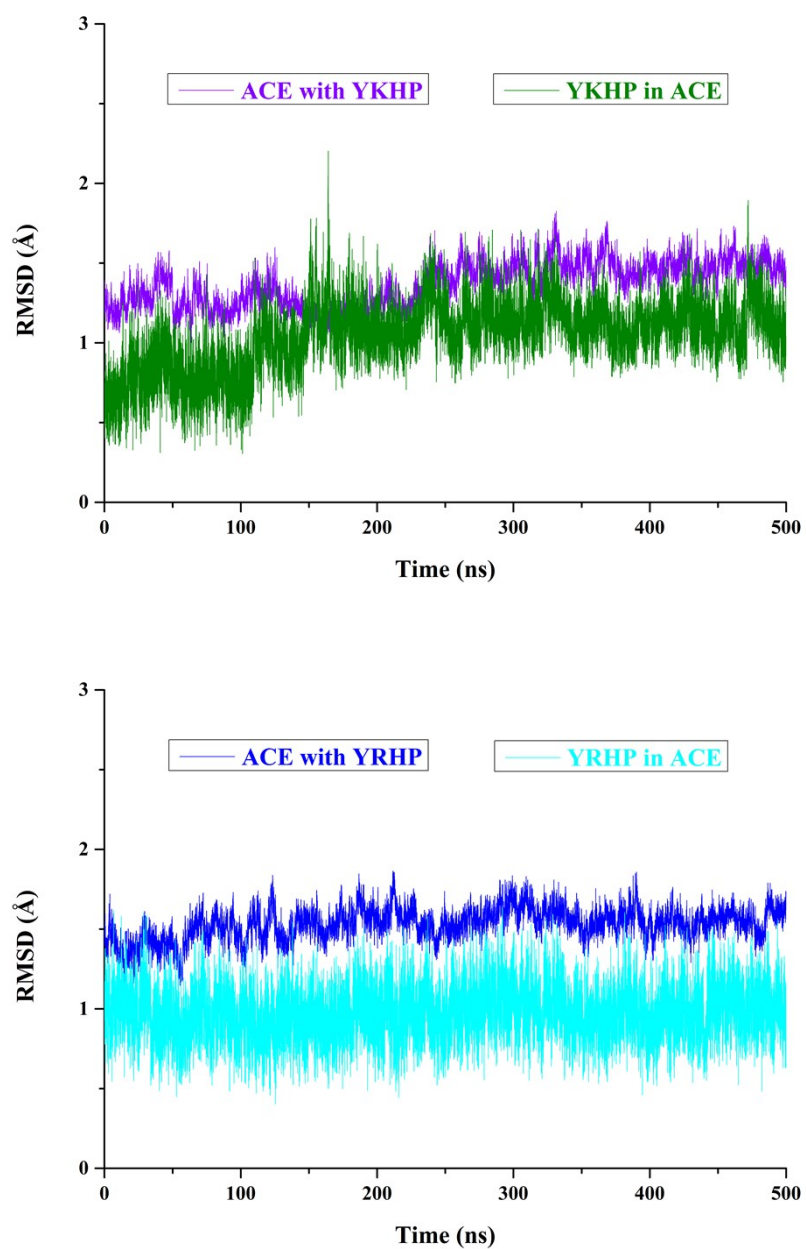

**Fig. S2** RMSD curves of the backbone atoms of hACEs and tetrapeptides in the four complex systems during the production simulation phase. Taking the initially constructed model as the reference, the structural superimpositions were performed on the basis of the hACE backbone atoms prior to the RMSD calculation.

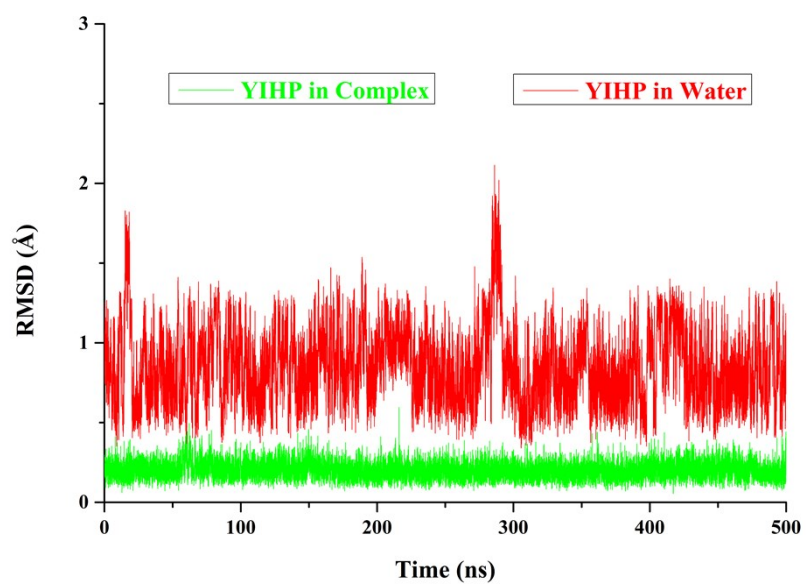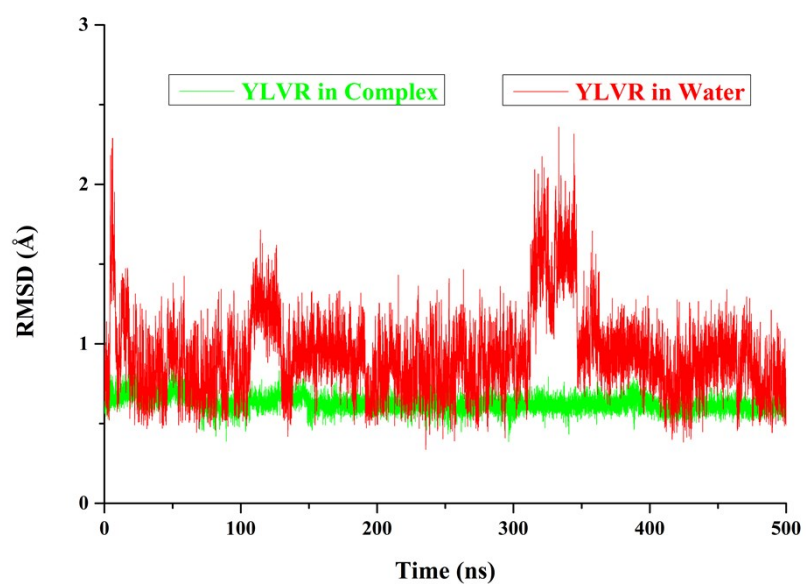

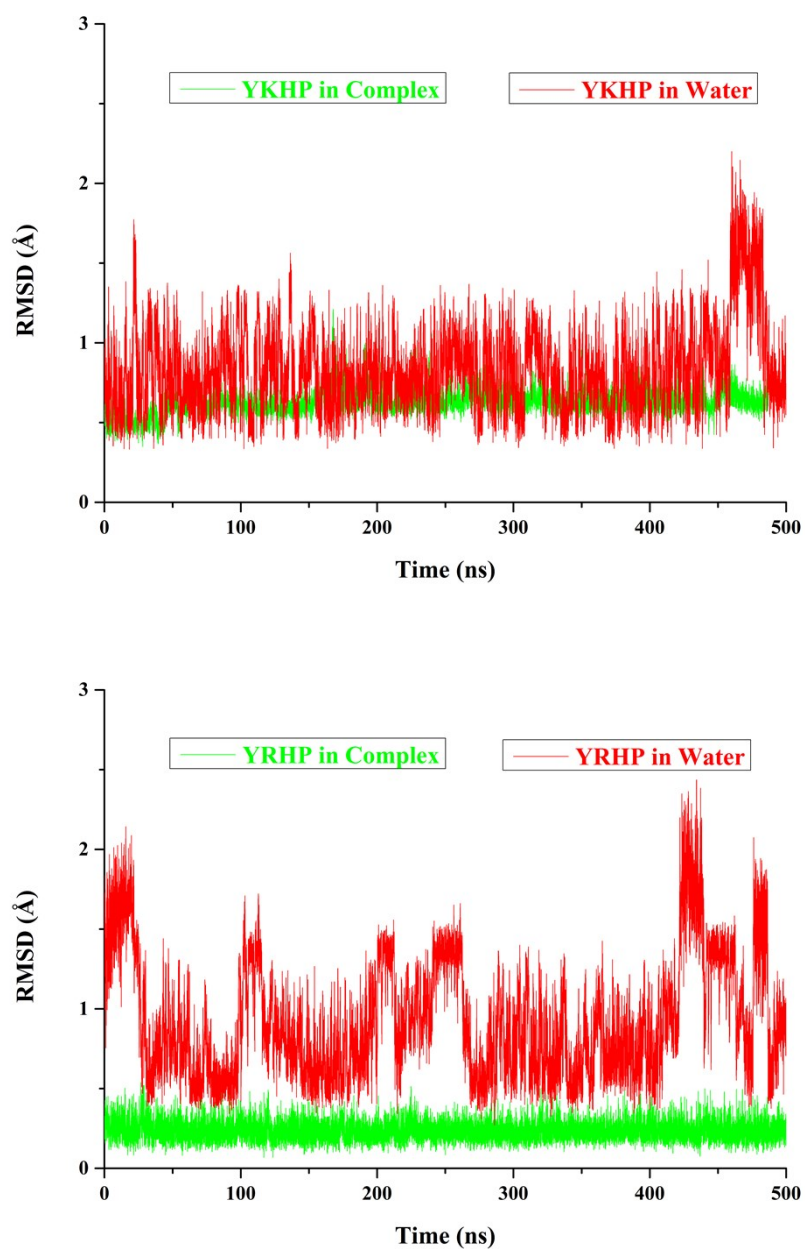

**Fig. S3** RMSD curves of the backbone atoms of four tetrapeptides in the complex (green) and aqueous (red) systems during the production simulation phase. Taking the initial conformation of each tetrapeptide in the complex system as the reference, the structural superimpositions were performed on the basis of the backbone atoms prior to the RMSD calculation.

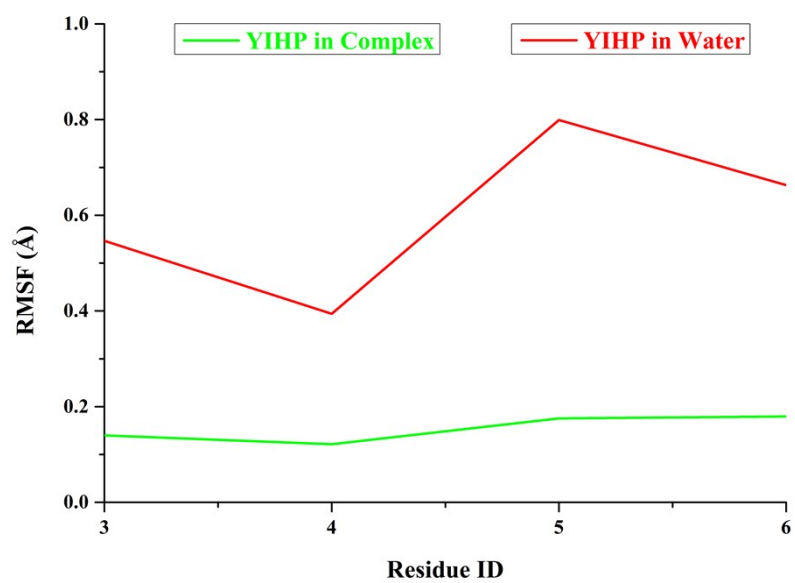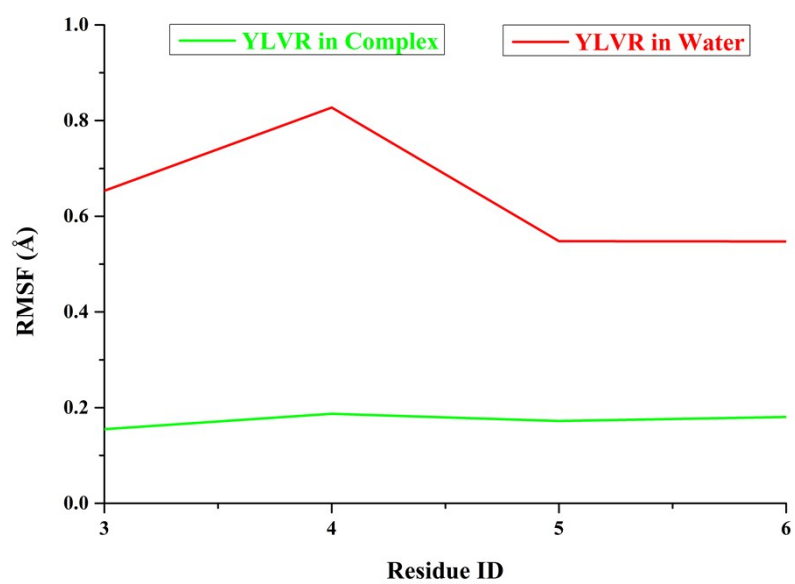

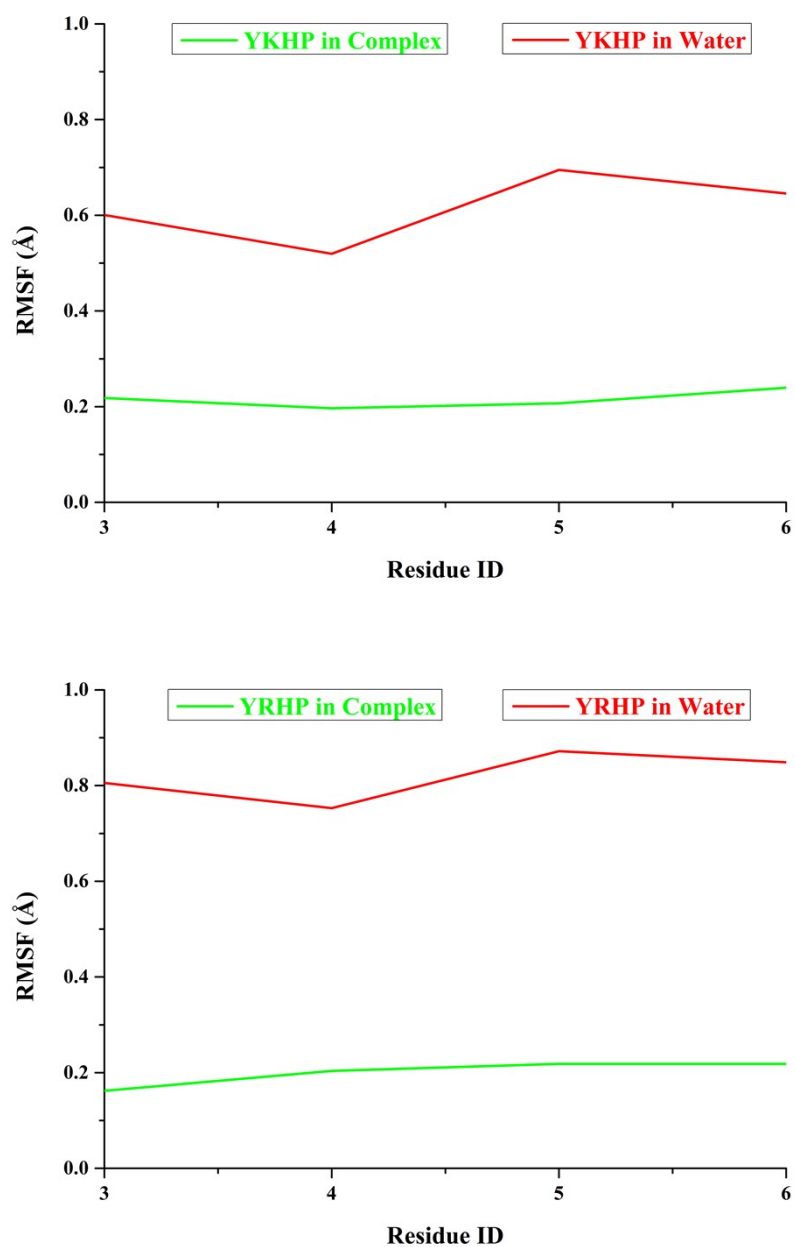

**Fig. S4** RMSF curves of the C $\alpha$  atoms of four tetrapeptides in the complex (green) and aqueous (red) systems during the production simulation phase. The structural superimpositions were performed on the basis of the C $\alpha$  atoms prior to the RMSF calculation.

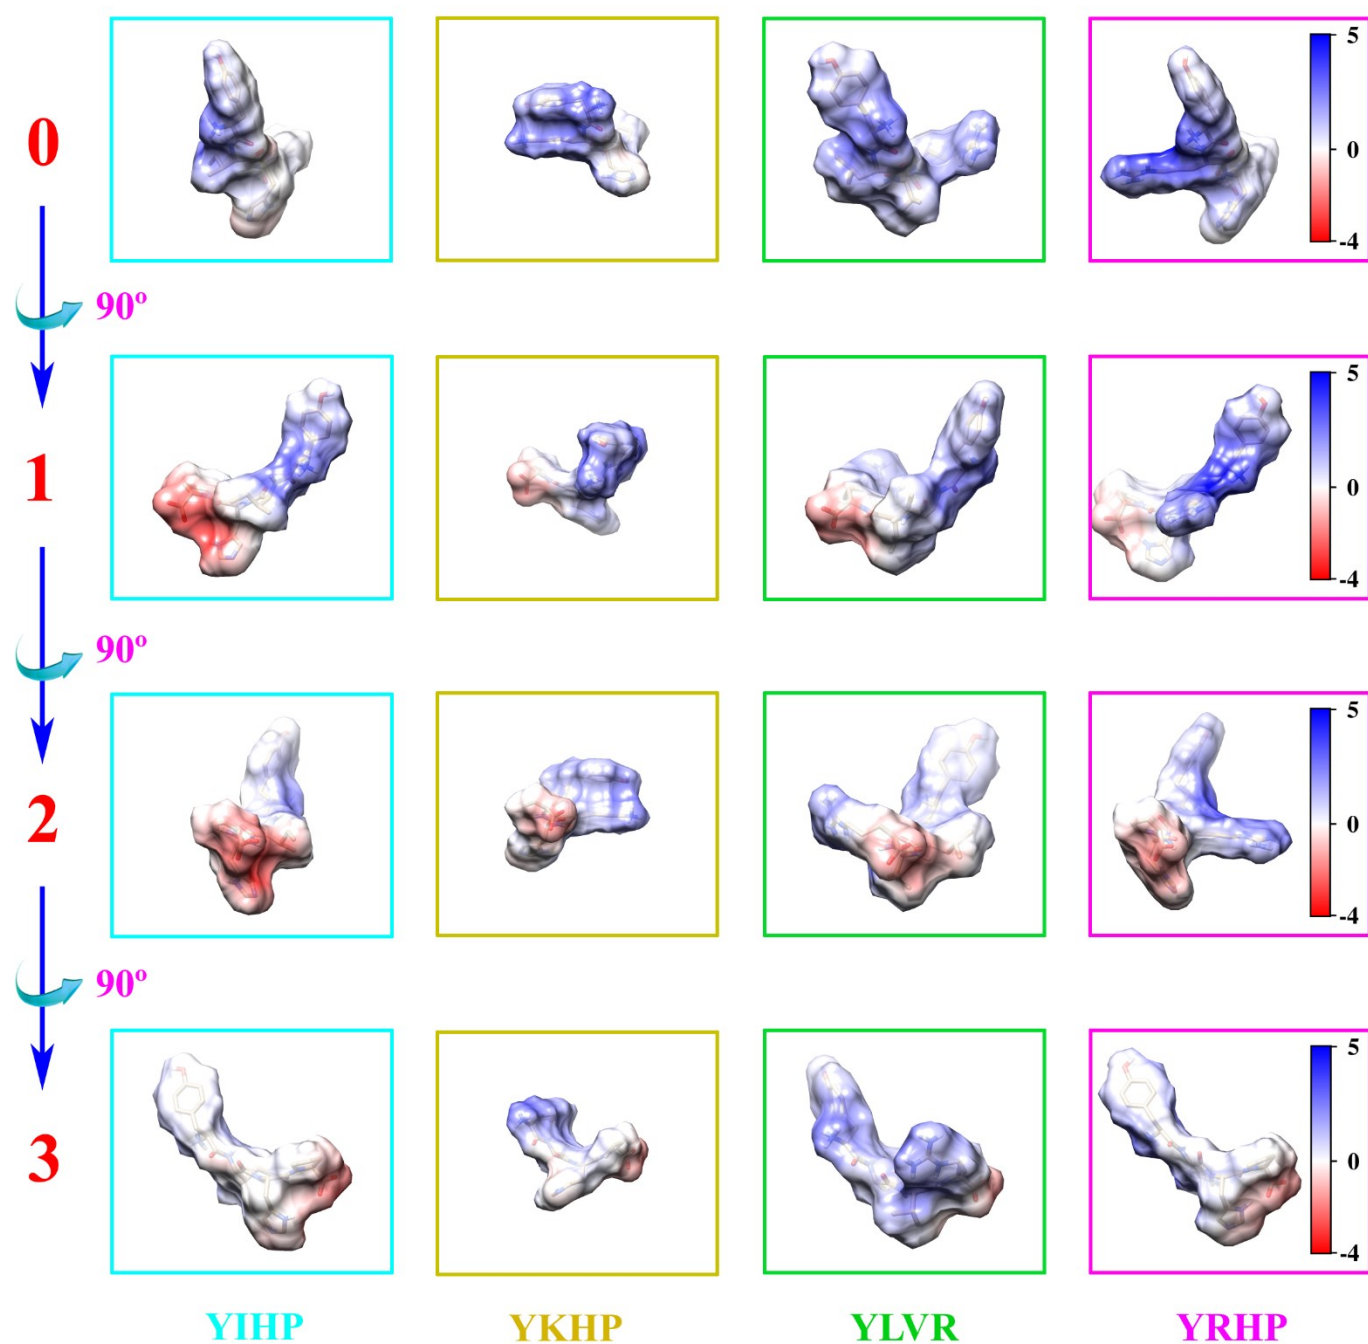

**Fig. S5** The electrostatic potential surface for the representative conformations of four ligands. All the ligands were first superimposed and then calculated the electrostatic potential surface.

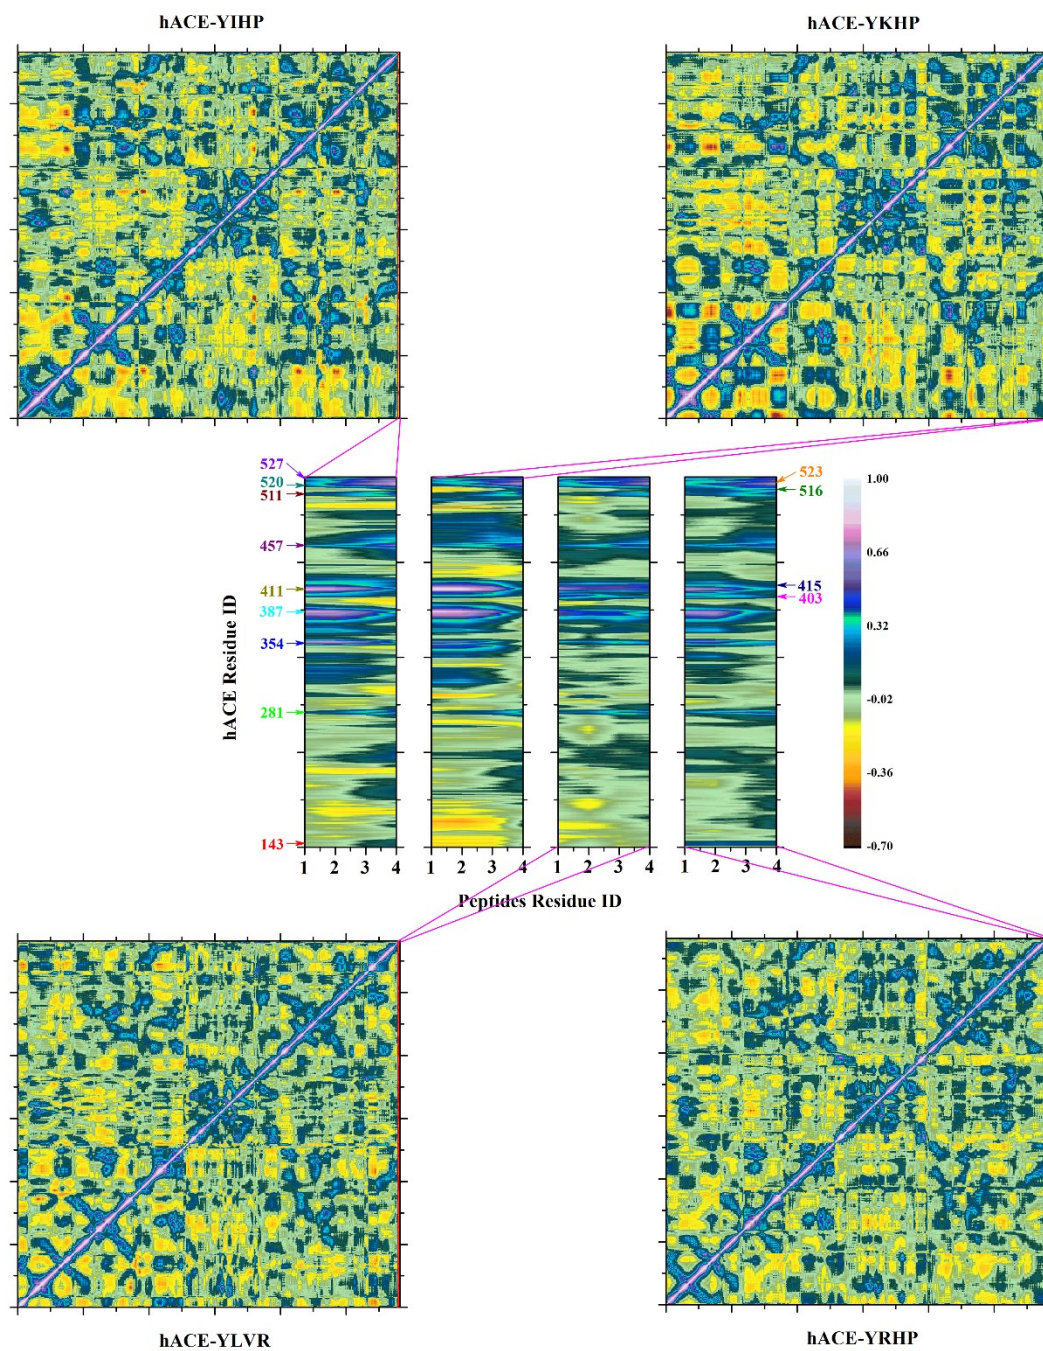

**Fig. S6** Correlation analysis of the motion based on the C $\alpha$  atoms during the 500 ns MD production simulation of the hACE-tetrapeptide complexes. At the center is the corresponding detail view of the correlation map for each complex.

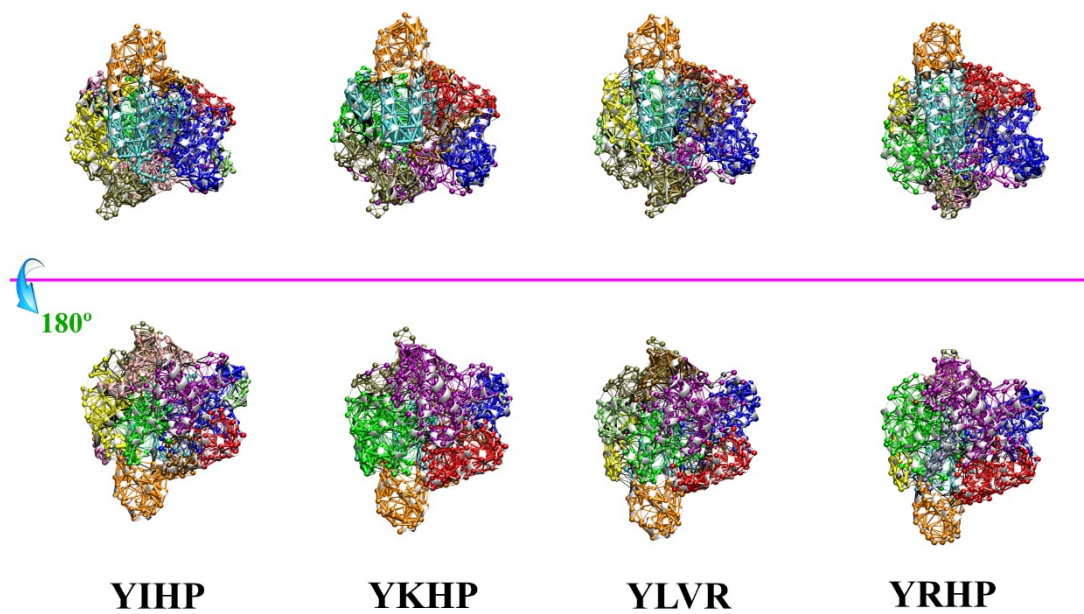

**Fig. S7** Community distribution of four complex systems. The communities with the same color have the greatest similarity to each other.
